# Supplementary material
Source: publisher figshare collection journal article supplement (https://acs.figshare.com/ndownloader/files/31614812)
Supplement: Supplementary file 1 [file 31614812]

## Supporting Information

Comparison of microflow and analytical flow liquid chromatography coupled to mass spectrometry global metabolomics methods using a urea cycle disorders mouse model

Sarah Geller<sup>1,2</sup>, Harvey Lieberman<sup>1†</sup>, Adam J. Belanger<sup>1††</sup>, Nelson S. Yew<sup>1</sup>, Alla Kloss<sup>1</sup>, Alexander R. Ivanov<sup>2\*</sup>

<sup>1</sup>Sanofi, Waltham, MA, 02451, USA

<sup>2</sup>Barnett Institute of Chemical and Biological Analysis, Department of Chemistry and Chemical Biology, Northeastern University, Boston, MA, 02115, USA

†Current address: Novartis, Cambridge, MA 02139 USA

††Current address: Pfizer, Cambridge, MA 02139 USA

\*Corresponding Author

Tel: +1 617 373 6549

E-mail: a.ivanov@northeastern.edu

## Table of Contents

Figure S1. PCA plots of mouse brain homogenate samples

Figure S2. Representative results confirming the instrumental stability for the brain homogenate sample analysis in the positive ionization mode

Figure S3. Representative results confirming the instrumental stability for the brain homogenate sample analysis in the negative ionization mode

Figure S4. Representative Venn Diagram of those features with a %CV less than 75% for each sample group

Figure S5. Representative trend plots showing the desired trends for trend analysis filtering

Figure S6. Graphs of all identified metabolites present in mouse brain homogenate samples

Figure S7. PCA plots of mouse urine samples

Figure S8. Representative results confirming the instrumental stability for the urine sample analysis in the positive ionization mode

Figure S9. Representative results confirming the instrumental stability for the urine sample analysis in the negative ionization mode

Figure S10. Graphs of all identified metabolites present in mouse urine samples analyzed using the ion-pairing method in the positive ionization mode

Figure S11. Graphs of all identified metabolites present in mouse urine samples analyzed using the microflow method in the positive ionization mode

Figure S12. Graphs of all identified metabolites present in mouse urine samples analyzed using the ion-pairing method in the negative ionization mode

Figure S13. Graphs of all identified metabolites present in mouse urine samples analyzed using the microflow method in the negative ionization mode

Figure S14. Metabolic pathway map highlighting known UCD biomarkers

Table S1. Percentage of detected features calculated to be linear as grouped by retention time during dilution factor optimization

Table S2. Percentage of detected features calculated to be linear as grouped by  $m/z$  during dilution factor optimization

Table S3. Sample number per group for mouse brain homogenate samples analyzed using both ion-pairing and microflow based methods

Table S4. Sample number per group for mouse urine samples analyzed using both ion-pairing and microflow based methods

Table S5. Summary of the metabolites identified in the brain homogenate samples analyzed using the ion-pairing and microflow based methods

Table S6. Data processing step where metabolites were filtered out of for mouse brain homogenate samples in the positive ionization mode

Table S7. Data processing step where metabolites were filtered out of for mouse brain homogenate samples in the negative ionization mode

Table S8. Summary of the metabolites identified in the urine samples analyzed using the ion-pairing and microflow based methods

Table S9. Data processing step where metabolites were filtered out of for mouse urine samples in the positive ionization mode

Table S10. Data processing step where metabolites were filtered out of for mouse urine samples in the negative ionization mode

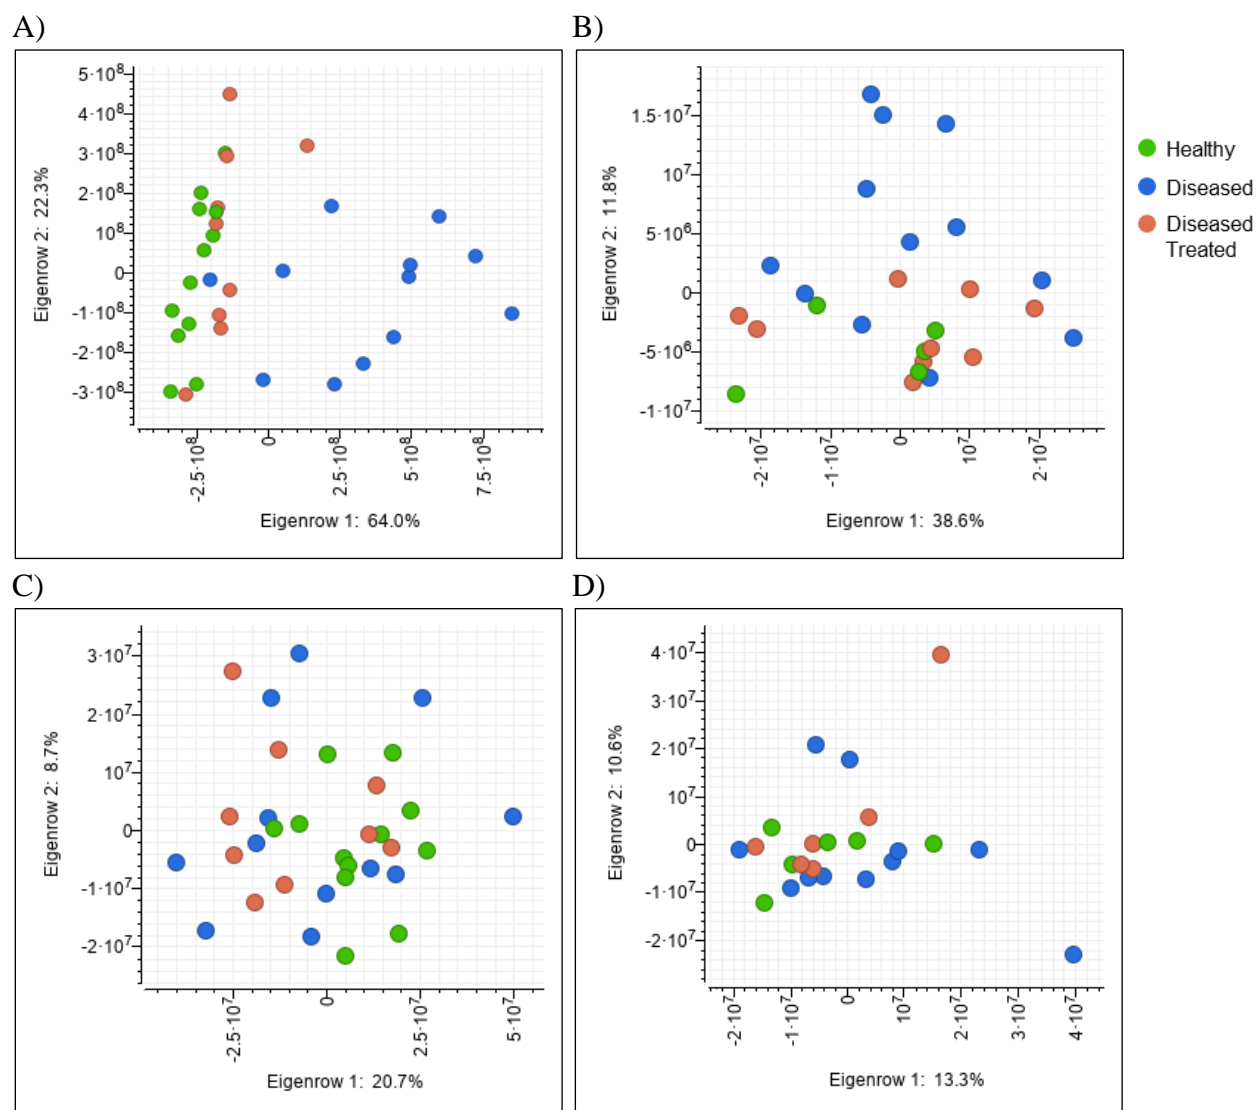

**Figure S1.** PCA plots of mouse brain homogenate samples. Shown are results from the positive ESI mode analysis using the A) ion-pairing-based LC method and B) microflow-based LC method; and the negative ESI mode analysis using the C) ion-pairing-based LC method and D) microflow-based LC method

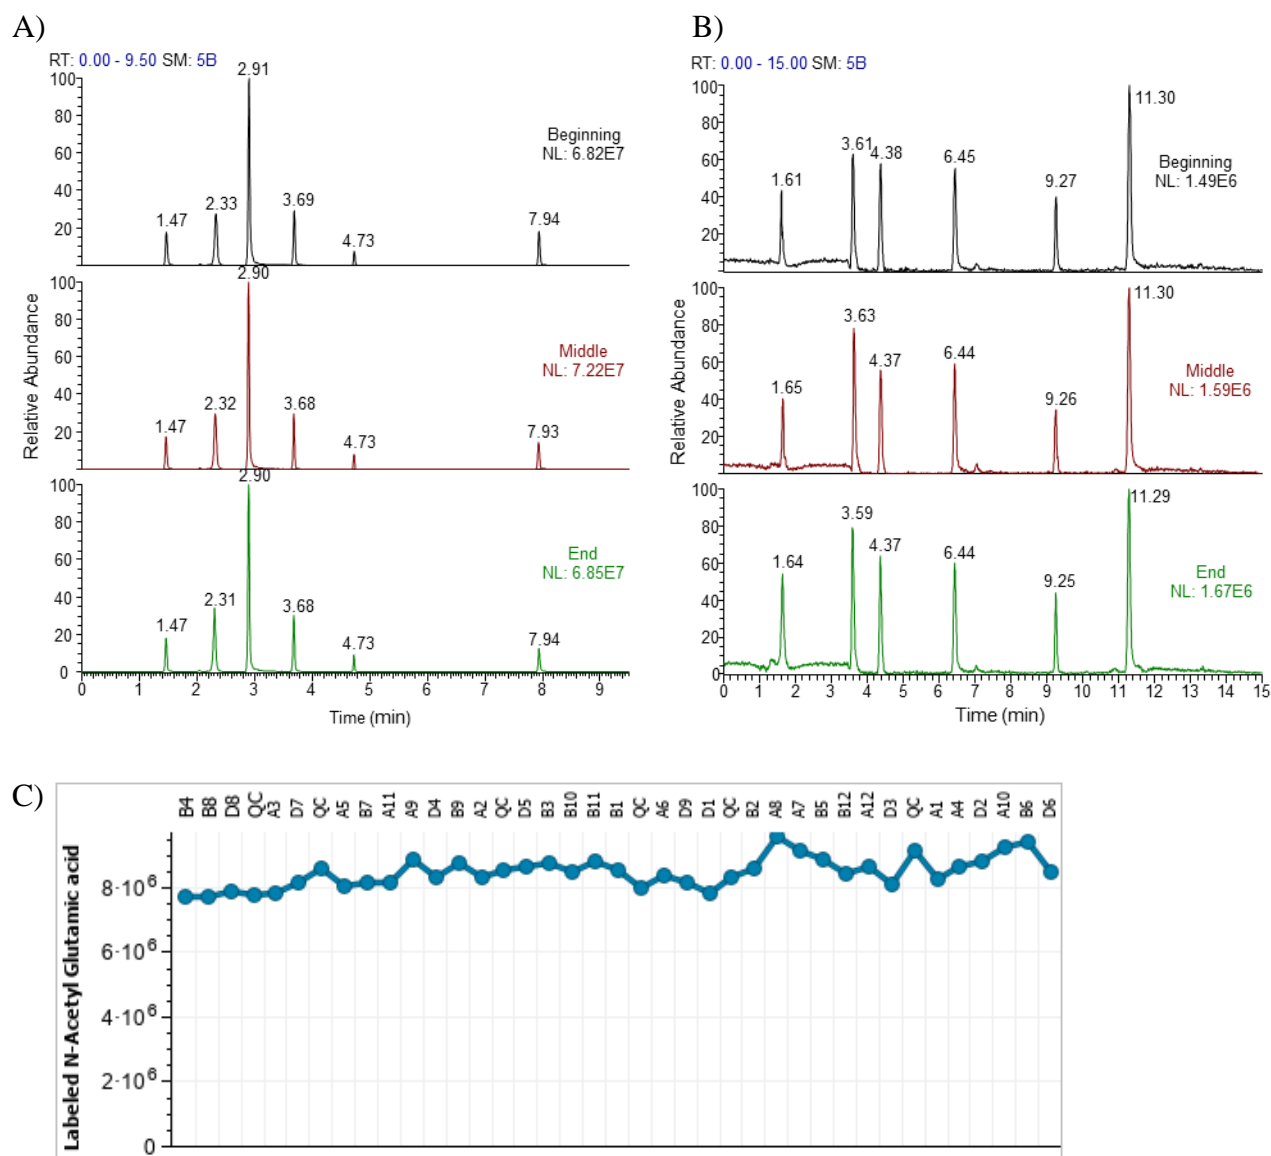

**Figure S2.** Representative results confirming the instrumental stability for the analysis of the brain homogenate samples analyzed using the microflow and analytical flow ion-pairing based methods in the positive ionization mode. A) Extracted ion chromatograms (5 ppm mass accuracy) of QC injections analyzed at the beginning, middle, and end of the ion-pairing method sequence. Analytes shown (from left to right): glycine, homoserine : threonine, nicotinamide, acetylcarnitine, tryptophan, sphinganine. B) Extracted ion chromatograms (5 ppm mass accuracy) of QC injections analyzed at the beginning, middle, and end of the reversed-phase microflow method sequence. Analytes shown (from left to right): deoxycarnitine, guanosine, tryptophan, azelate, hydroxyphenyllactate, sphinganine. C) The normalized maximum intensity of the isotopically labeled N-acetyl glutamic acid internal standard in all sample and QC injections analyzed using the ion-pairing-based method. The percent relative standard deviation of the internal standards across all sample and QC injections was < 20% with both methods.

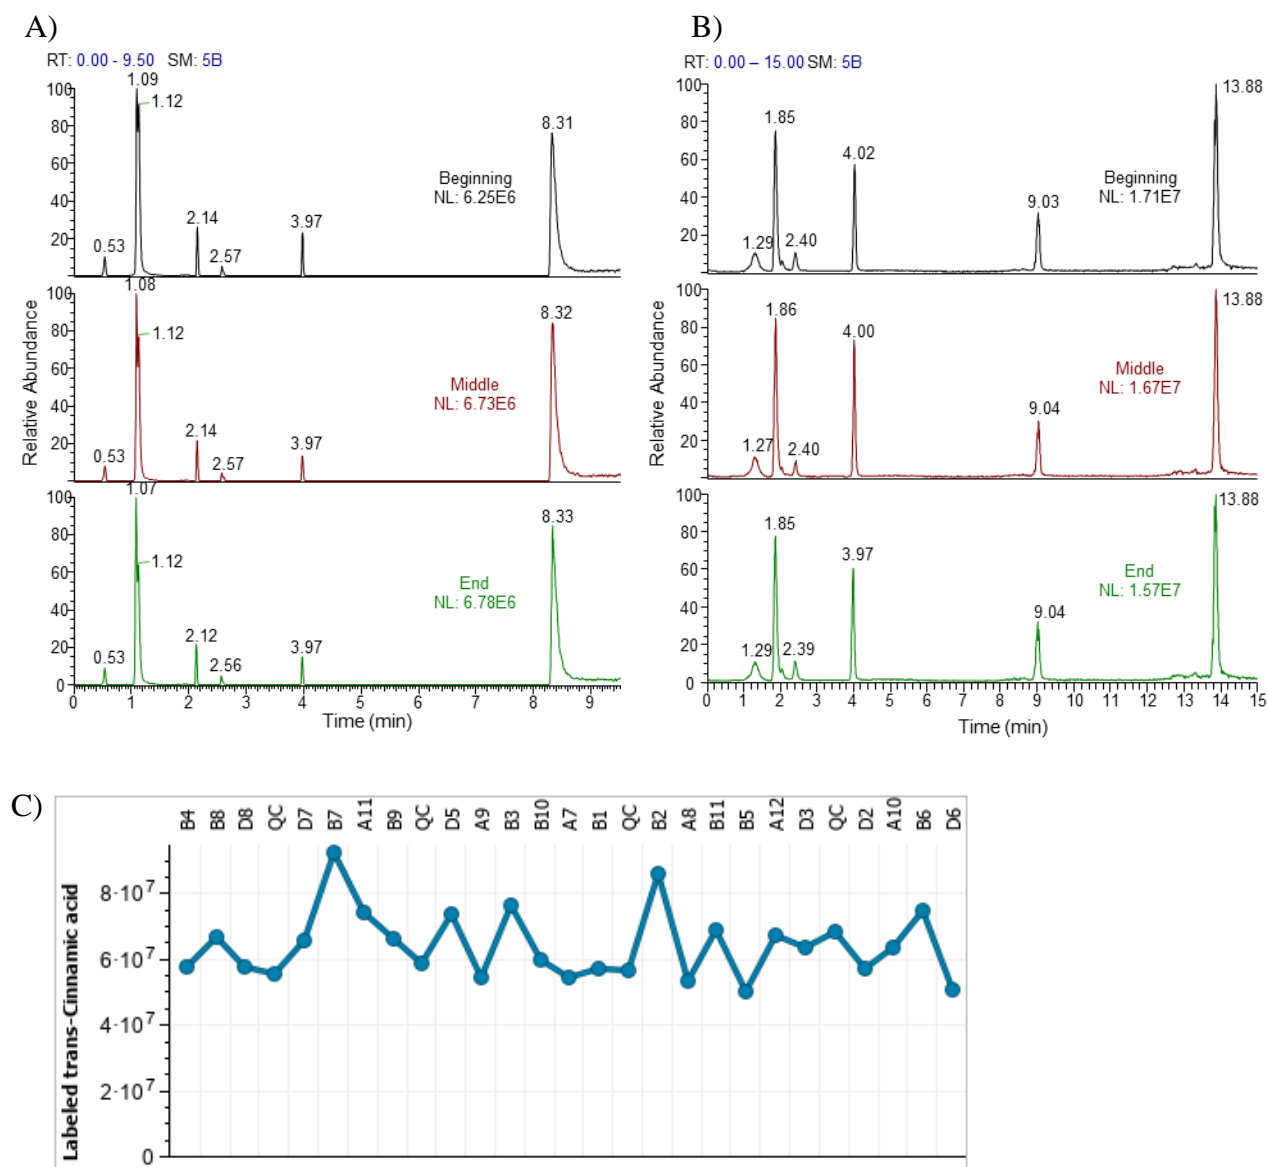

**Figure S3.** Representative results confirming the instrumental stability for the analysis of the brain homogenate samples analyzed using the microflow and analytical flow ion-pairing based methods in the negative ionization mode. A) Extracted ion chromatograms (5 ppm mass accuracy) of QC injections analyzed at the beginning, middle, and end of the ion-pairing method sequence. Analytes shown (from left to right): alanine : sarcosine, aspartic acid, inosine, glycerol 2-phosphate : sn-glycerol 3-phosphate, 2-phosphoglyceric acid, palmitic acid. B) Extracted ion chromatograms (5 ppm mass accuracy) of QC injections analyzed at the beginning, middle, and end of the reversed-phase microflow method sequence. Analytes shown (from left to right): glucose : other simple sugars, glutamic acid : N-acetylserine, glutathione, inosine, heptanoate, laurate. C) The normalized maximum intensity of the isotopically labeled trans-cinnamic acid internal standard in all sample and QC injections analyzed using the microflow method. The percent relative standard deviation of the internal standards across all sample and QC injections was < 20% with both methods.

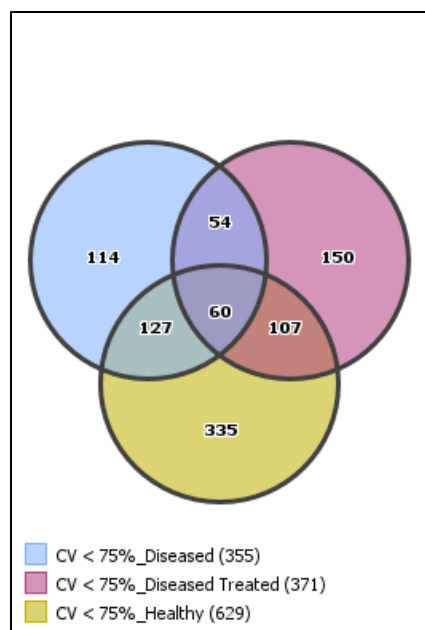

**Figure S4.** Representative Venn Diagram of those features with a %CV less than 75% (CV < 75%) for each sample group (diseased, diseased treated, and healthy). The total number of features passing this filter is shown in the parentheses after each group ID. Features passing the %CV filter in more than one group (overlapping regions) were selected for additional data processing. In this example, 348 features are found in the overlapping regions. Example shown was from the positive ionization mode profiling of brain homogenate samples using the microflow-based LC method.

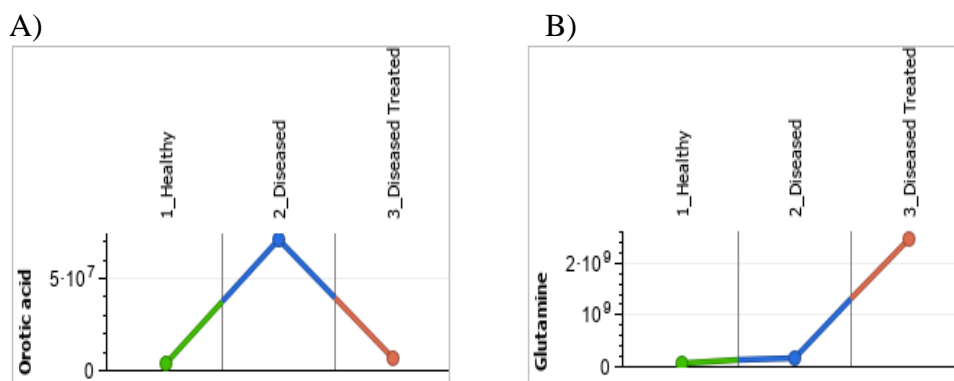

**Figure S5.** Representative trend plots of the normalized mean maximum intensity showing the desired trends for trend analysis filtering. A) Corrected by treatment in either the brain homogenate or urine samples and B) elevated with urinary excretion.

A)

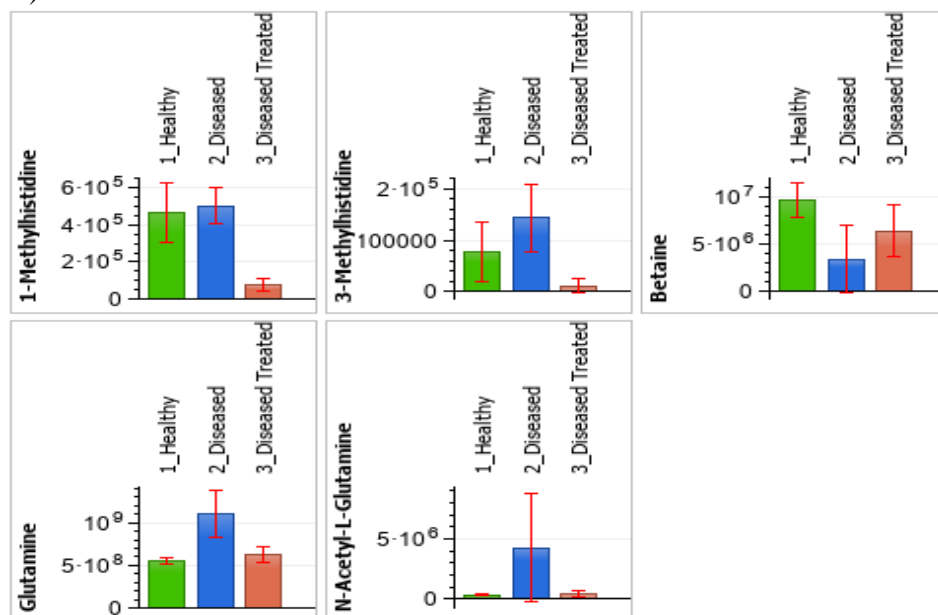

B)

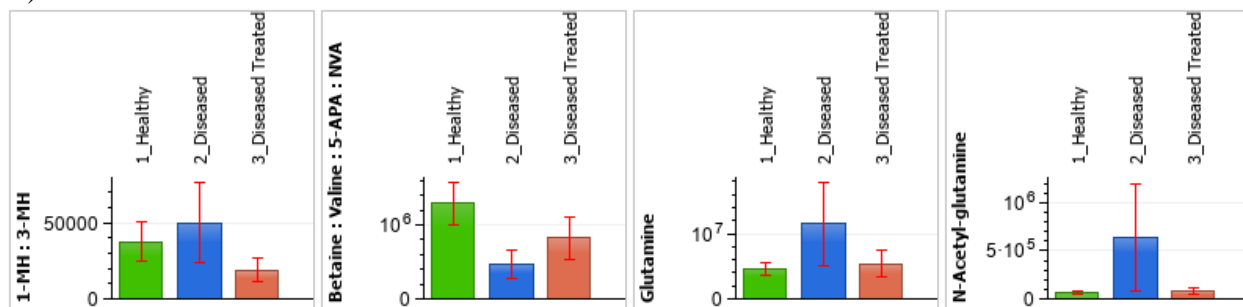

**Figure S6.** Graphs of the normalized mean maximum intensity for all identified metabolites present in mouse brain homogenate samples analyzed using the A) ion-pairing based method and the B) microflow-based LC method in the positive ionization mode. 1-MH: 1-Methylhistidine; 3-MH: 3-Methylhistidine; 5-APA: 5-Aminopentanoic acid; NVA: Norvaline



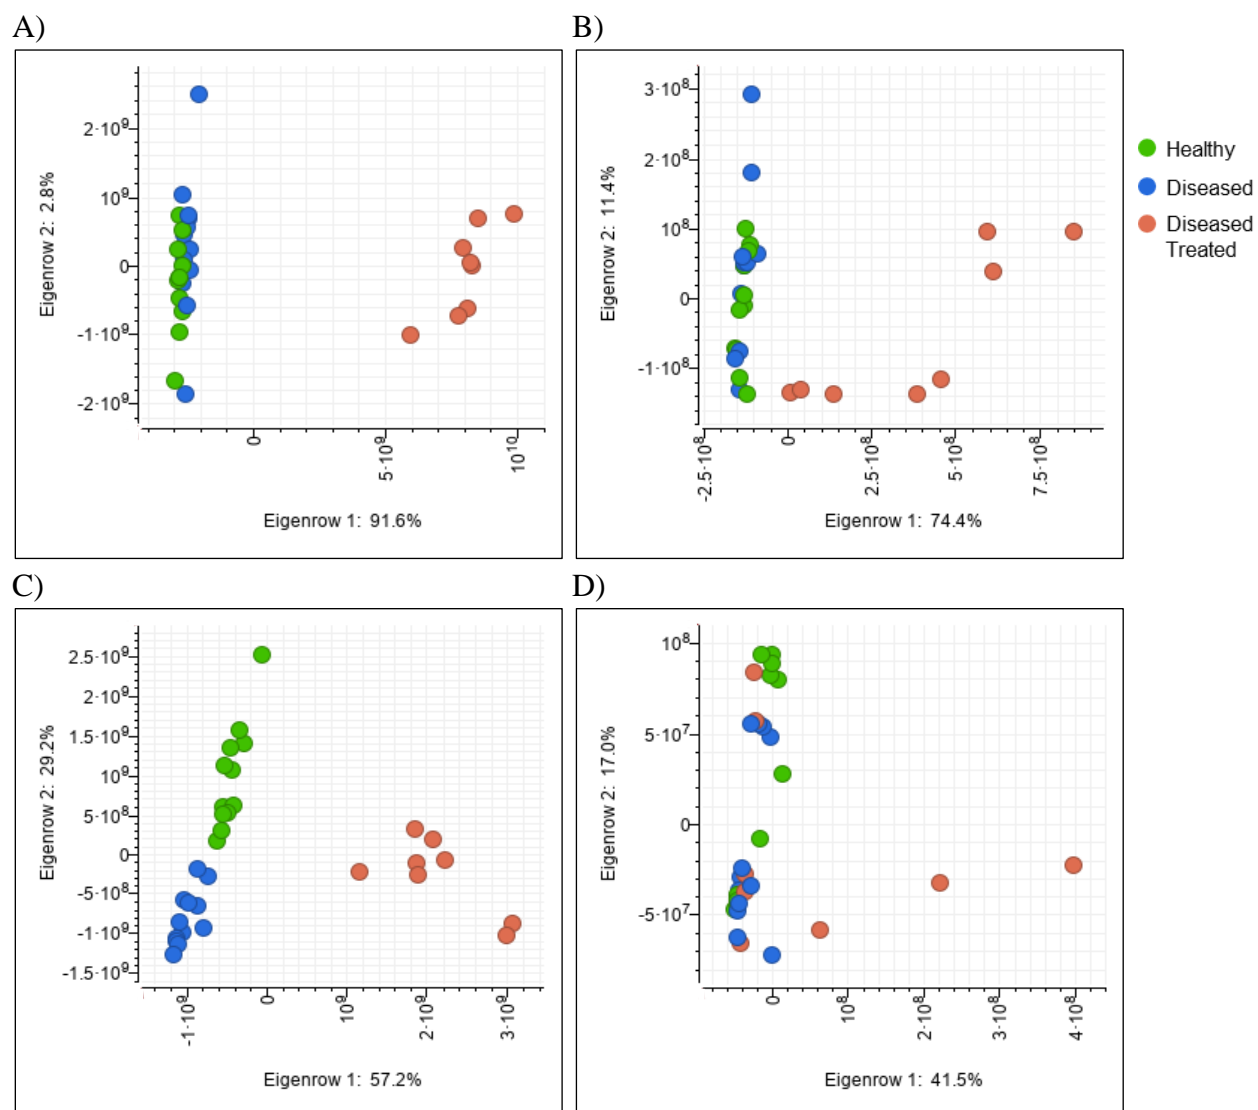

**Figure S7.** PCA plots of mouse urine samples. Shown are results from the positive ESI mode analysis using the A) ion-pairing-based LC method and B) microflow-based LC method; and the negative ESI mode analysis using the C) ion-pairing-based LC method and D) microflow-based LC method.

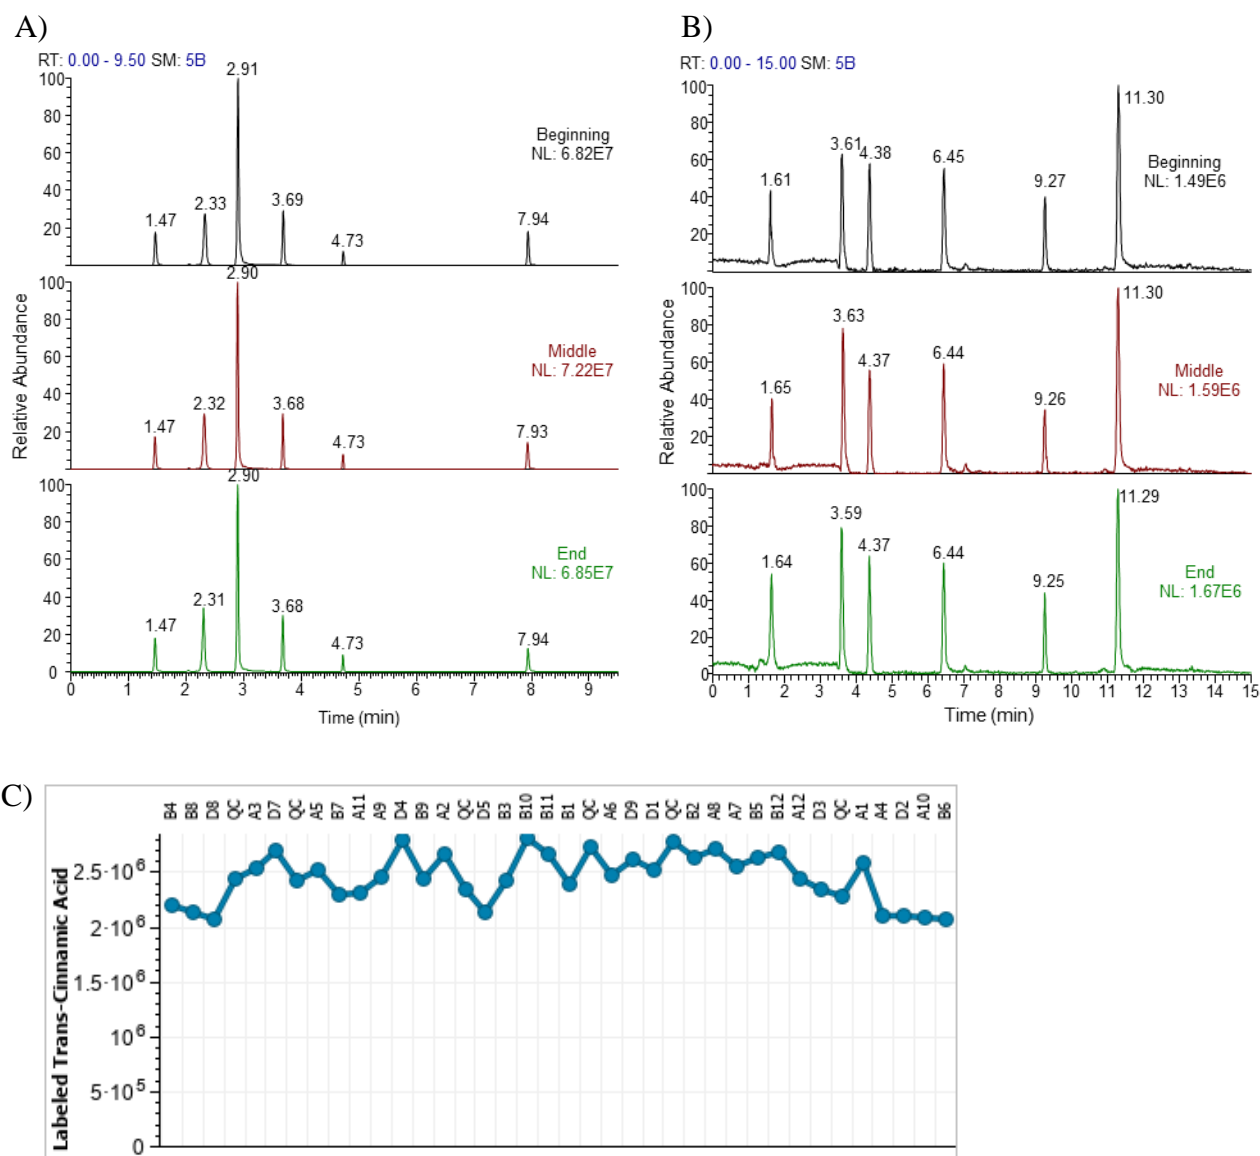

**Figure S8.** Representative results confirming the instrumental stability for the analysis of the urine samples analyzed using the microflow and analytical flow ion-pairing based methods in the positive ionization mode. A) Extracted ion chromatograms (5 ppm mass accuracy) of QC injections analyzed at the beginning, middle, and end of the ion-pairing method sequence. Analytes shown (from left to right): glutamine, threonine, cystine, lysine, 1-methylhistamine : 3-methylhistamine, tryptophan. B) Extracted ion chromatograms (5 ppm mass accuracy) of QC injections analyzed at the beginning, middle, and end of the reversed-phase microflow method sequence. Analytes shown (from left to right): lysine, histidine, glutamine, leucine : isoleucine, N-acetylalanine, tryptophan, isotopically labeled trans-cinnamic acid. C) The normalized maximum intensity of the isotopically labeled trans-cinnamic acid internal standard in all sample and QC injections analyzed using the microflow method. The percent relative standard deviation of the internal standards across all sample and QC injections was < 20% with both methods.

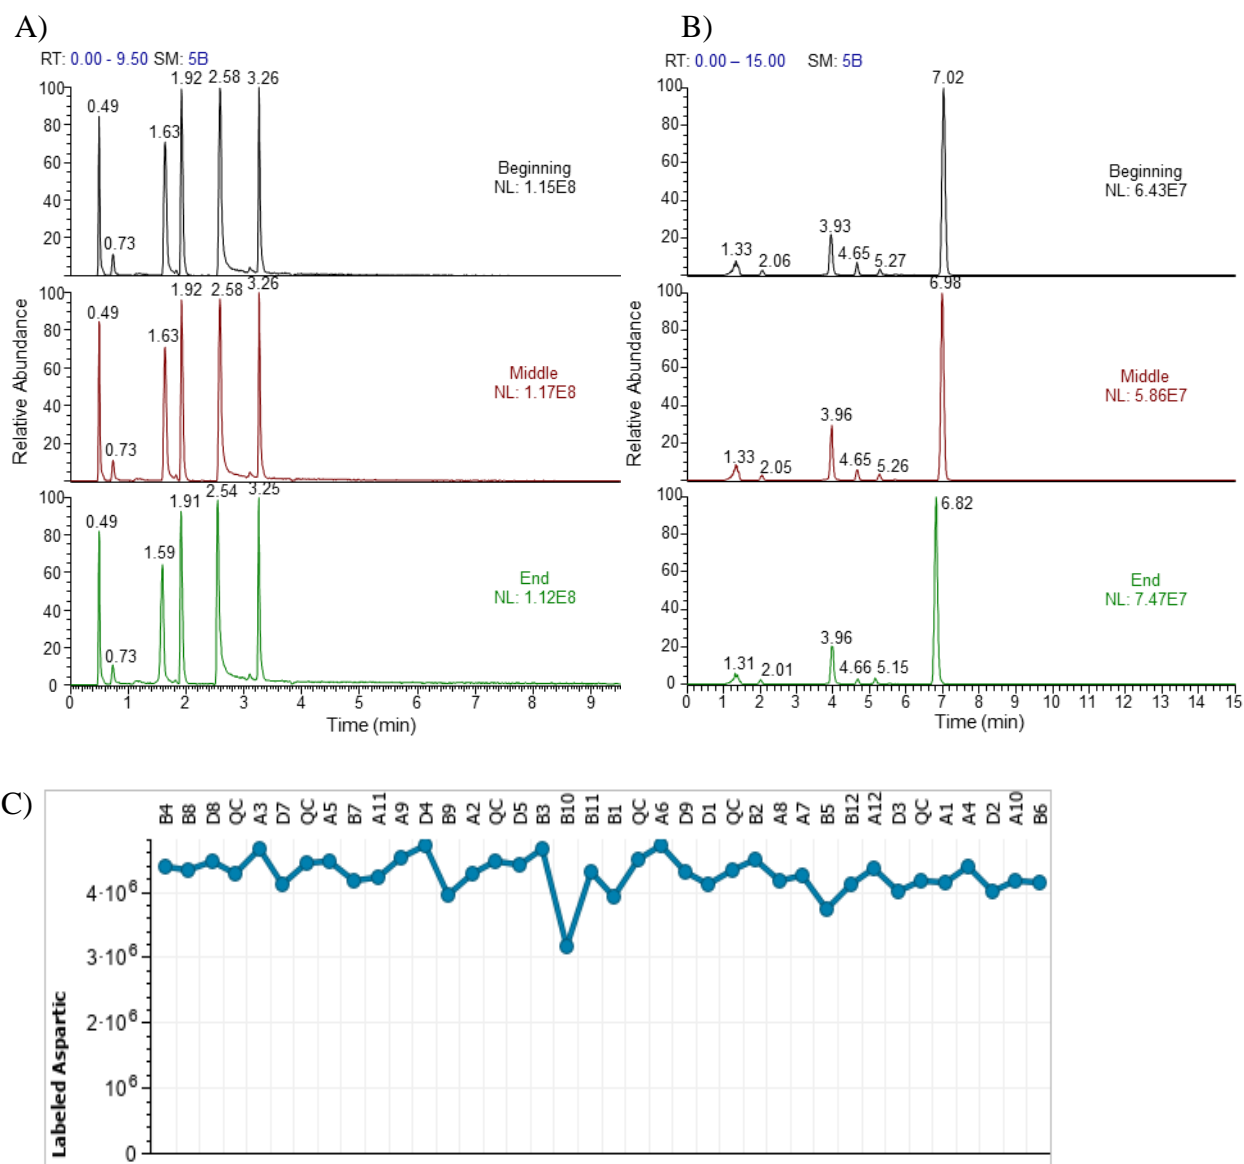

**Figure S9.** Representative results confirming the instrumental stability for the analysis of the urine samples analyzed using the microflow and analytical flow ion-pairing based methods in the negative ionization mode. A) Extracted ion chromatograms (5 ppm mass accuracy) of QC injections analyzed at the beginning, middle, and end of the ion-pairing method sequence. Analytes shown (from left to right): serine, pipecolic acid, tyrosine, N-acetyl-glutamine, phenylalanine, p-cresol glucuronide. B) Extracted ion chromatograms (5 ppm mass accuracy) of QC injections analyzed at the beginning, middle, and end of the reversed-phase microflow method sequence. Analytes shown (from left to right): homoserine : threonine, ureidopropionic acid, phenylalanine, tryptophan, N-acetylmethionine, p-cresol glucuronide. C) The normalized maximum intensity of the isotopically labeled aspartic acid internal standard in all sample and QC injections analyzed using the ion-pairing method. The percent relative standard deviation of the internal standards across all sample and QC injections was < 20% with both methods.

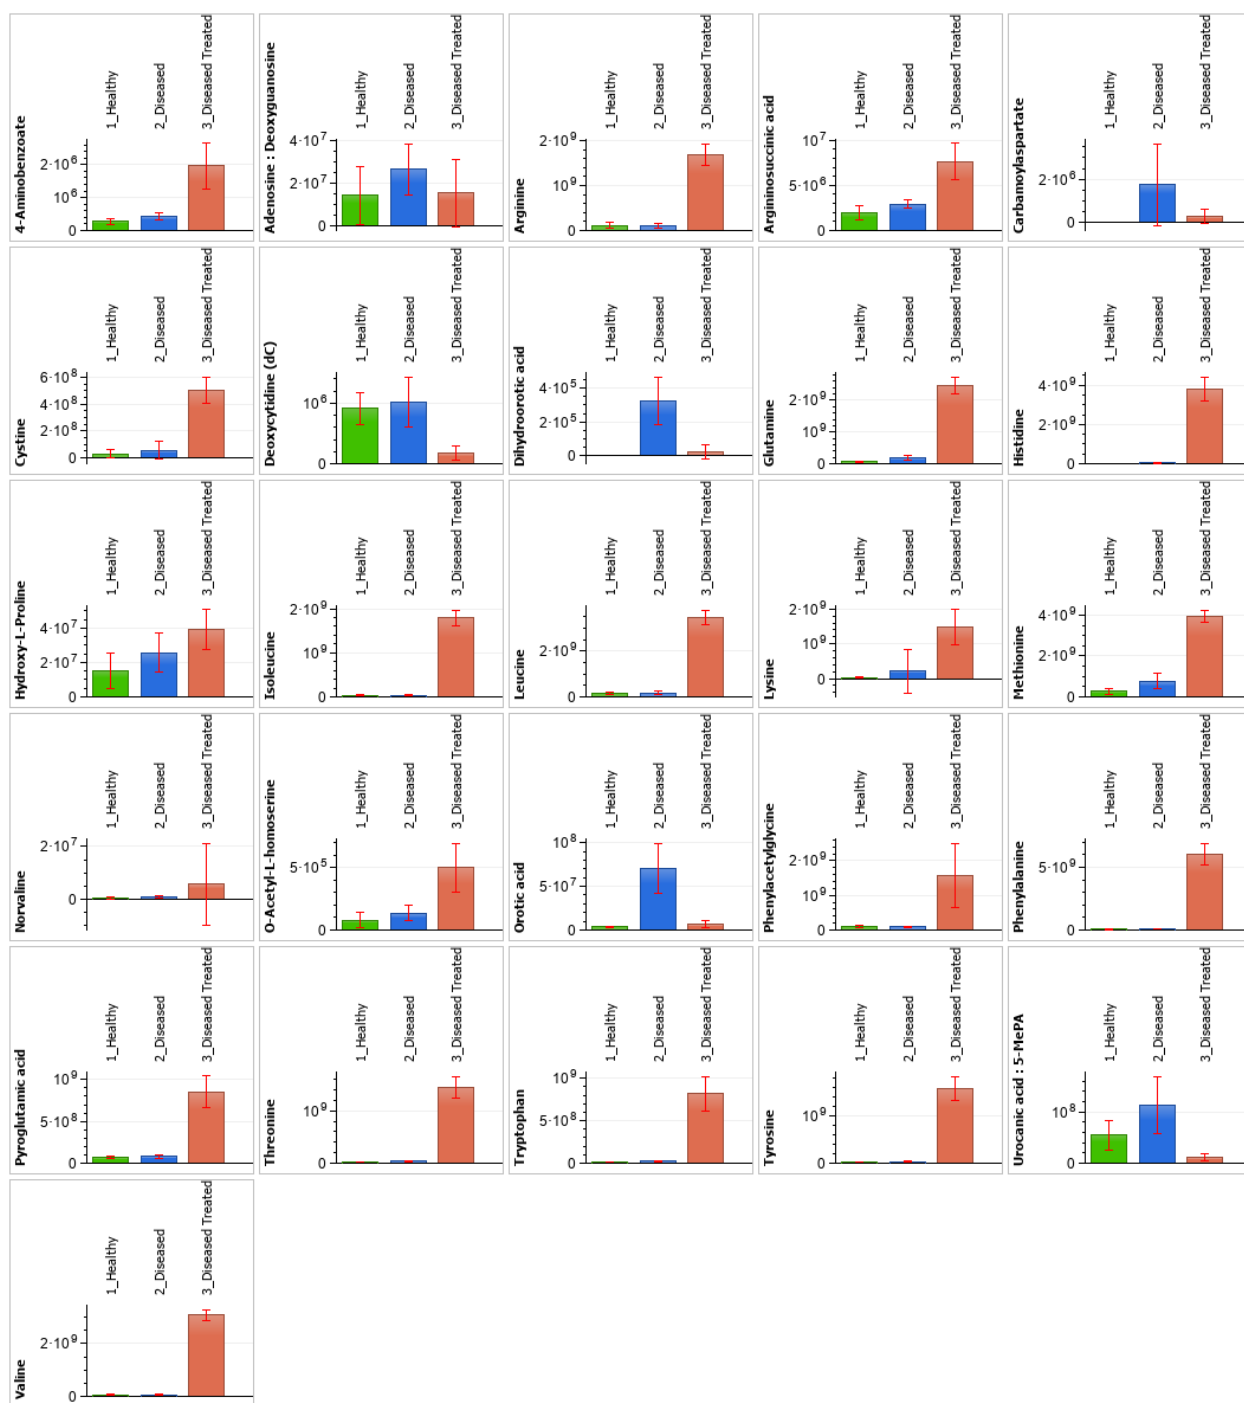

**Figure S10.** Graphs of the normalized mean maximum intensity for all identified metabolites present in mouse urine samples analyzed using the ion-pairing based method in the positive ionization mode. 5-MePA: 5-Methylpyrazine-2-carboxylic acid

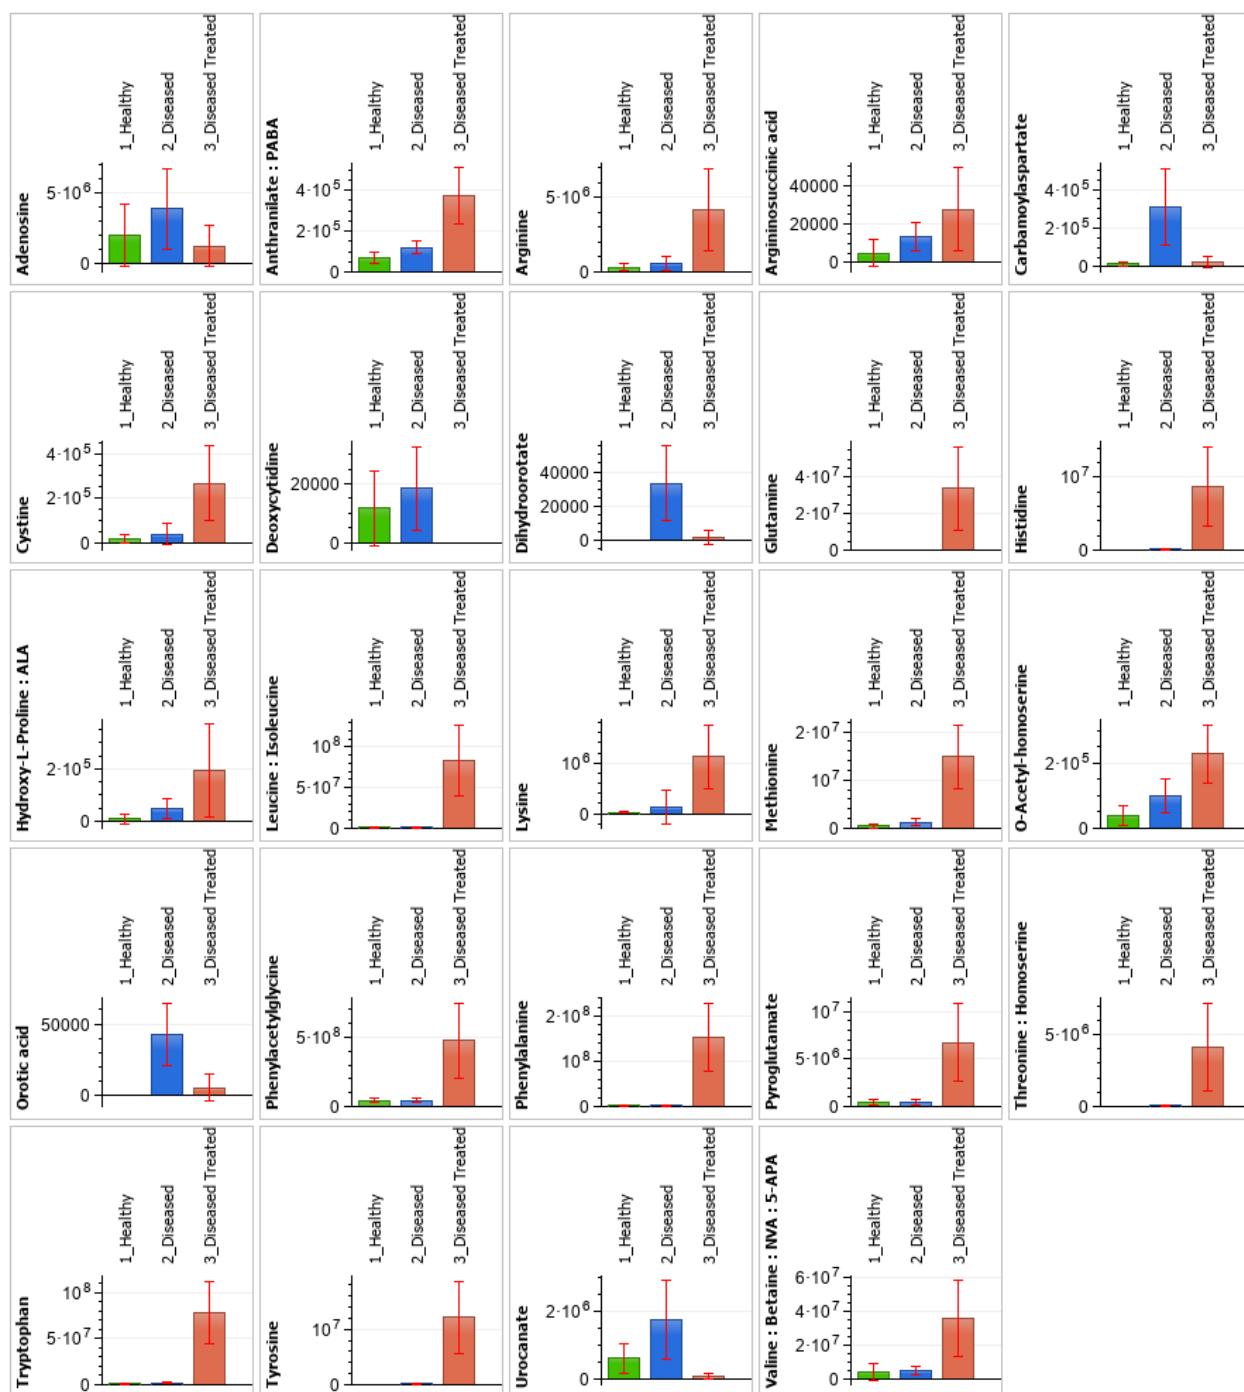

**Figure S11.** Graphs of the normalized mean maximum intensity for all identified metabolites present in mouse urine samples analyzed using the microflow method in the positive ionization mode. PABA: p-Aminobenzoic acid

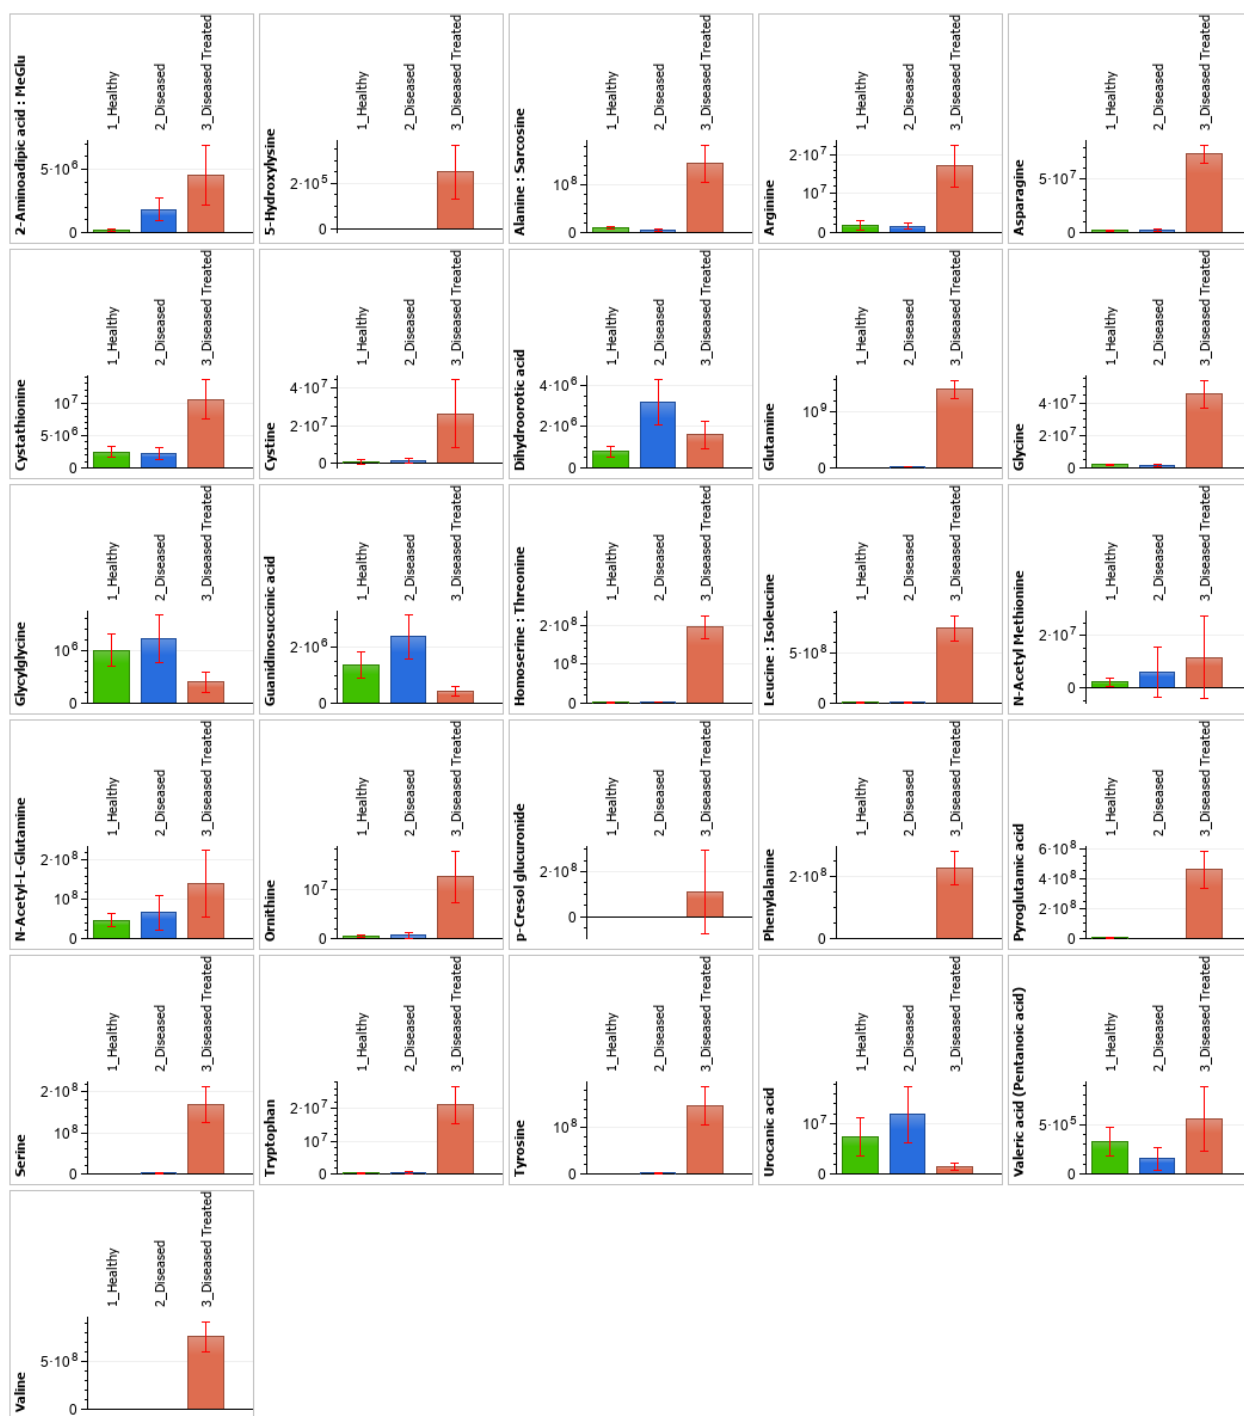

**Figure S12.** Graphs of the normalized mean maximum intensity for all identified metabolites present in mouse urine samples analyzed using the ion-pairing based method in the negative ionization mode. MeGlu: N-Methylglutamate

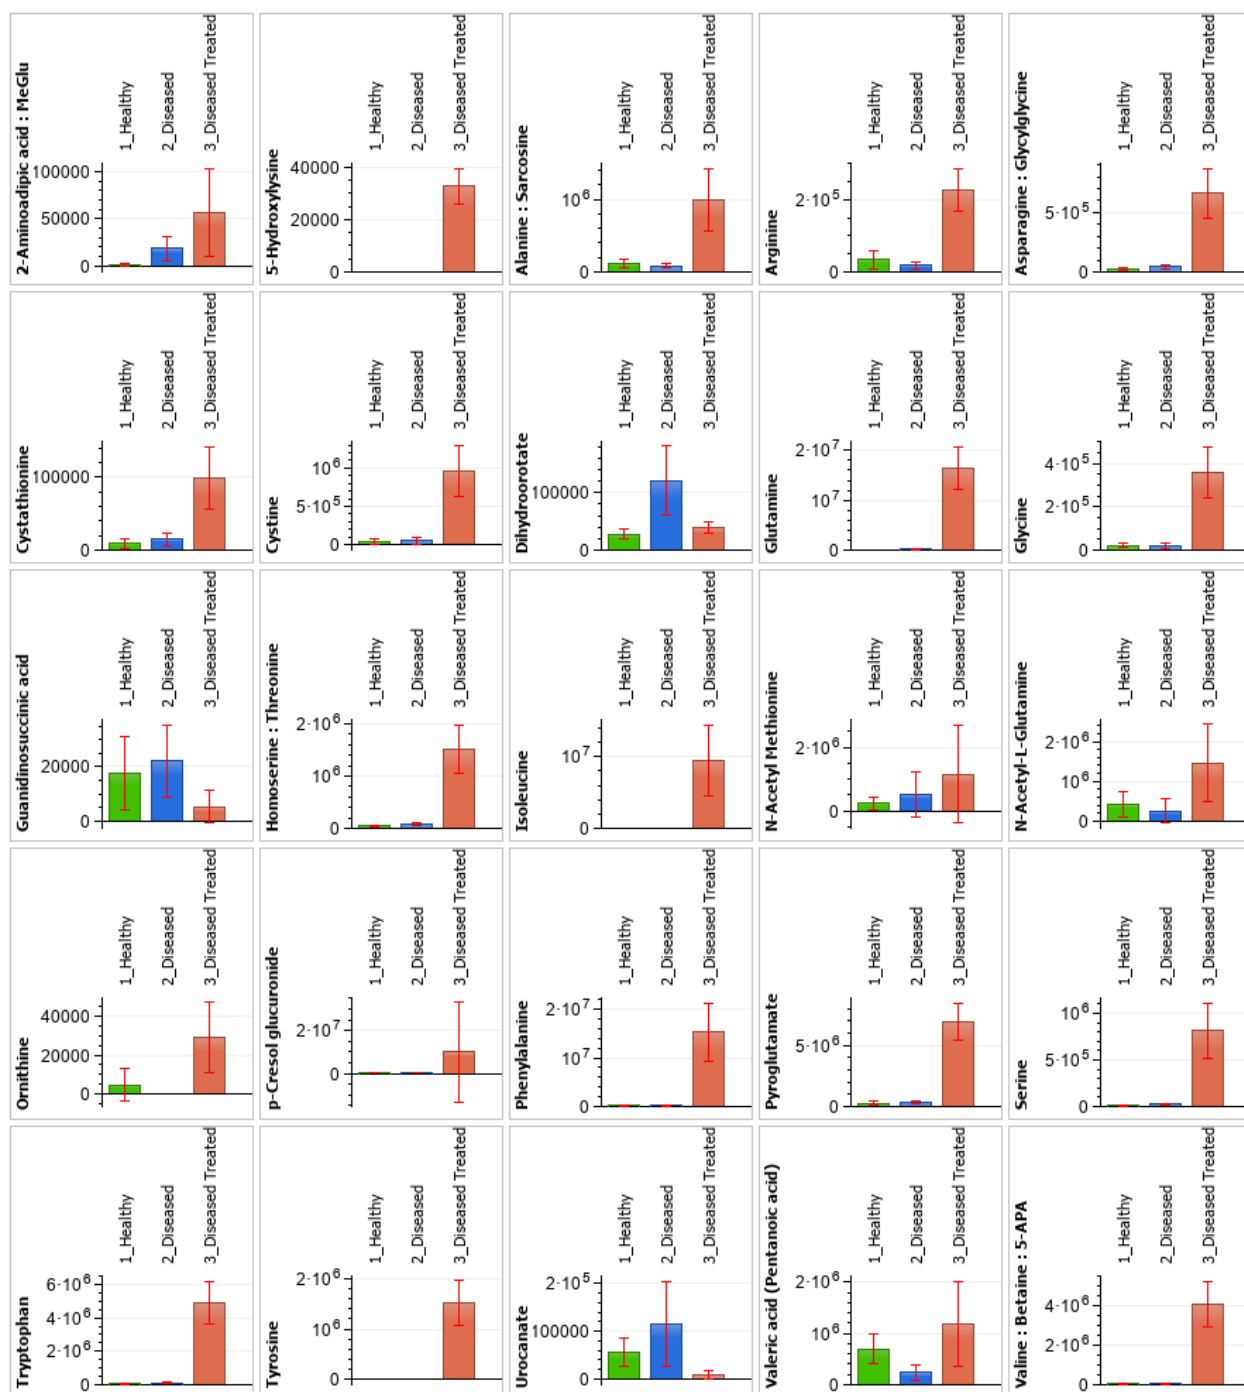

**Figure S13.** Graphs of the normalized mean maximum intensity for all identified metabolites present in mouse urine samples analyzed using the microflow method in the negative ionization mode. MeGlu: N-Methylglutamate; 5-APA: 5-Aminopentanoic acid

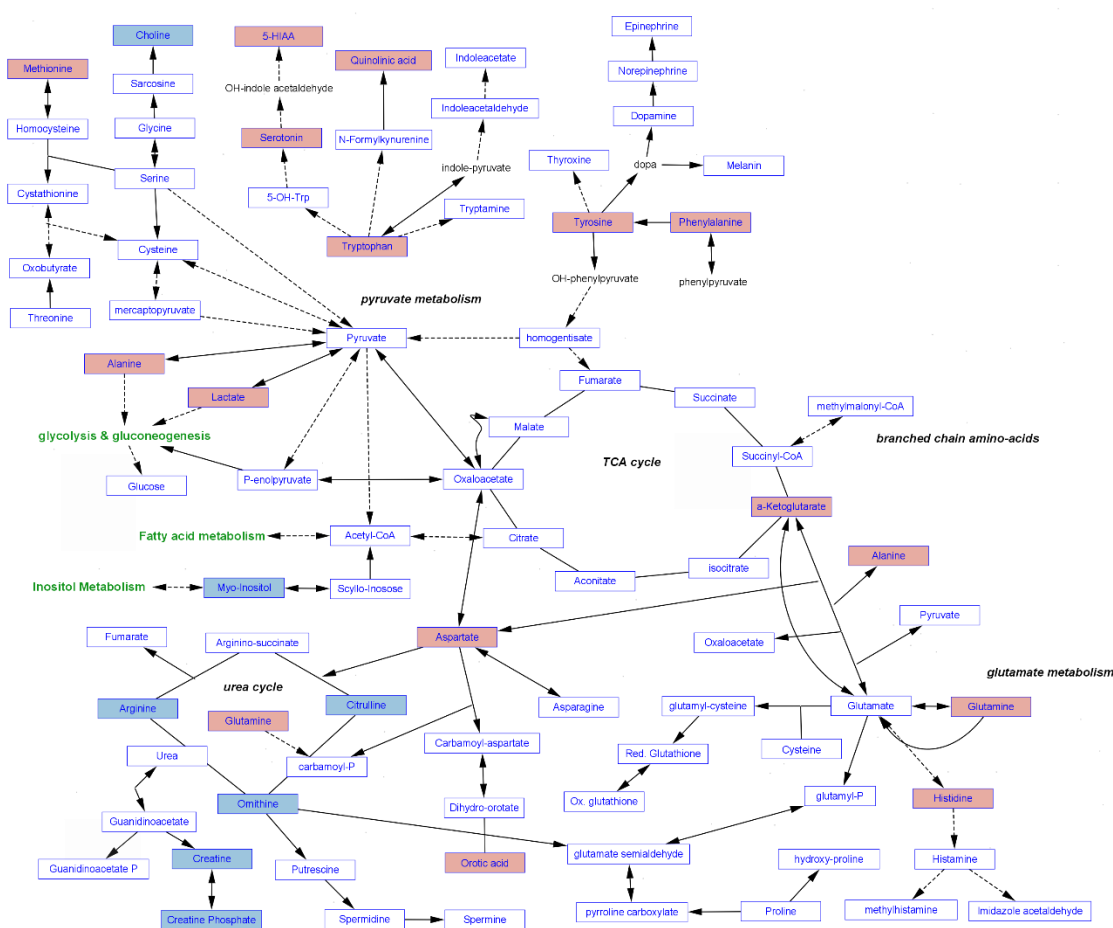

**Figure S14.** Metabolic pathway map highlighting known UCD biomarkers. Metabolites upregulated by the disease are shown in pink, while those metabolites which are downregulated by the disease are shown in blue. The pathway was generated using the WikiPathways app in Cytoscape v3.8.2.



Table S1. Percentage of features with a linear response detected in brain homogenate samples in the positive ionization mode with the microflow method during dilution factor optimization. The data is grouped by retention time window.

| Retention Time Window | Neighboring Dilution Factors |       |        |         | Total Features |
|-----------------------|------------------------------|-------|--------|---------|----------------|
|                       | 30:60                        | 60:90 | 90:120 | 120:150 |                |
| 0 - 1                 | 20                           | 30    | 38     | 42      | 846            |
| 1 - 2                 | 35                           | 57    | 60     | 58      | 1979           |
| 2 - 3                 | 21                           | 27    | 29     | 28      | 739            |
| 3 - 4                 | 24                           | 34    | 36     | 33      | 1369           |
| 4 - 5                 | 19                           | 22    | 25     | 26      | 4161           |
| 5 - 6                 | 20                           | 27    | 27     | 25      | 4716           |
| 6 - 7                 | 21                           | 27    | 30     | 28      | 4999           |
| 7 - 8                 | 21                           | 28    | 27     | 26      | 4103           |
| 8 - 9                 | 38                           | 26    | 22     | 17      | 14007          |
| 9 - 10                | 34                           | 26    | 22     | 21      | 12839          |
| 10 - 11               | 26                           | 28    | 27     | 25      | 5316           |
| 11 - 12               | 31                           | 34    | 41     | 39      | 2759           |
| 12 - 13               | 19                           | 35    | 37     | 36      | 2186           |
| 13 - 14               | 20                           | 29    | 27     | 34      | 1775           |
| 14 - 15               | 18                           | 42    | 42     | 44      | 874            |
| 15 - 16               | 17                           | 30    | 38     | 45      | 1086           |
| 16 - 17               | 6                            | 21    | 18     | 39      | 101            |

Table S2. Percentage of features with a linear response detected in brain homogenate samples in the positive ionization mode with the microflow method during dilution factor optimization. The data is grouped by the  $m/z$  range.

| $m/z$ Window | Neighboring Dilution Factors |       |        |         | Total Features |
|--------------|------------------------------|-------|--------|---------|----------------|
|              | 30:60                        | 60:90 | 90:120 | 120:150 |                |
| 0 - 100      | 19                           | 25    | 28     | 28      | 6606           |
| 100 - 200    | 19                           | 27    | 30     | 30      | 22716          |
| 200 - 300    | 20                           | 43    | 47     | 46      | 5292           |
| 300 - 400    | 20                           | 45    | 46     | 46      | 2877           |
| 400 - 500    | 18                           | 59    | 63     | 64      | 453            |
| 500 - 600    | 38                           | 50    | 58     | 51      | 175            |
| 600 - 700    | 46                           | 41    | 35     | 30      | 351            |
| 700 - 800    | 42                           | 25    | 18     | 13      | 7471           |
| 800 - 900    | 42                           | 25    | 19     | 15      | 11825          |
| 900 - 1000   | 34                           | 23    | 19     | 17      | 5910           |

Table S3. Number of brain homogenate samples per group analyzed using both the ion-pairing and microflow-based methods.

|                  | Positive ESI Mode |           | Negative ESI Mode |           |
|------------------|-------------------|-----------|-------------------|-----------|
|                  | Ion-Pairing       | Microflow | Ion-Pairing       | Microflow |
| Healthy          | 12                | 5         | 12                | 6         |
| Diseased         | 12                | 12        | 12                | 11        |
| Diseased Treated | 9                 | 9         | 9                 | 6         |

Table S4. Number of urine samples per group analyzed using both the ion-pairing and microflow-based methods.

|                  | Positive ESI Mode |           | Negative ESI Mode |           |
|------------------|-------------------|-----------|-------------------|-----------|
|                  | Ion-Pairing       | Microflow | Ion-Pairing       | Microflow |
| Healthy          | 12                | 12        | 12                | 12        |
| Diseased         | 12                | 12        | 12                | 12        |
| Diseased Treated | 8                 | 8         | 8                 | 8         |

Table S5. Summary of the metabolites identified in the brain homogenate samples analyzed using the ion-pairing and microflow based methods.

|                              | Positive ESI Mode                                                                           |           | Negative ESI Mode |           |
|------------------------------|---------------------------------------------------------------------------------------------|-----------|-------------------|-----------|
|                              | Ion-Pairing                                                                                 | Microflow | Ion-Pairing       | Microflow |
| Total Identified             | 21                                                                                          | 10        | 8                 | 2         |
| Detected by Both Methods (#) | 5                                                                                           |           | 0                 |           |
| Common Analyte (names)       | 1-Methyl-L-histidine;<br>3-Methyl-L-histidine;<br>Betaine; Glutamine;<br>N-Acetyl-glutamine |           | n/a               |           |

Table S6. Data processing step where metabolites were filtered out of for mouse brain homogenate samples in the positive ionization mode.

| Data Processing Step<br>Metabolite<br>Did Not Pass | Method Metabolite Did Not Pass Data Processing In |                                  |           |                                                                                                                                               |
|----------------------------------------------------|---------------------------------------------------|----------------------------------|-----------|-----------------------------------------------------------------------------------------------------------------------------------------------|
|                                                    | Ion-Pairing                                       |                                  | Microflow |                                                                                                                                               |
|                                                    | Number                                            | Analyte Name                     | Number    | Analyte Name                                                                                                                                  |
| Analyte is not present in reference database       |                                                   |                                  | 1         | 4-Methylene-L-glutamine                                                                                                                       |
| Standard was not detected*                         |                                                   |                                  | 1         | Adenosine 5'-monophosphate/<br>Deoxyguanosine 5'-monophosphate                                                                                |
| Peak not detected by GeneData**                    | 1                                                 | N-Acetylleucine                  | 8         | $\alpha$ -ketoglutaric acid;<br>Argininosuccinic acid;<br>Cadaverine;<br>Cystathionine;<br>Hypotaurine; Kynurenine;<br>Octopamine; Putrescine |
| p-value > 0.05                                     | 2                                                 | Adenosine;<br>Glutaryl carnitine | 5         | Histidine; Hydroxy-L-proline; N-Methylaspartate;<br>Pyroglutamate;<br>Acetylspermidine                                                        |
| Effect size > 0.9                                  | 2                                                 | 4-Guanidinobutanoate;<br>Valine  |           |                                                                                                                                               |
| CV > 75%, or not present in 2+ groups              |                                                   |                                  | 1         | Diethanolamine                                                                                                                                |
| Incorrect trend                                    |                                                   |                                  |           |                                                                                                                                               |

\* A retention time could not be obtained when the standard was tested

\*\* Confirmed by manual XIC in the raw data

Table S7. Data processing step where metabolites were filtered out of for mouse brain homogenate samples in the negative ionization mode.

| Data Processing Step<br>Metabolite<br>Did Not Pass | Method Metabolite Did Not Pass Data Processing In |                                                                                                 |           |                                                  |
|----------------------------------------------------|---------------------------------------------------|-------------------------------------------------------------------------------------------------|-----------|--------------------------------------------------|
|                                                    | Ion-Pairing                                       |                                                                                                 | Microflow |                                                  |
|                                                    | Number                                            | Analyte Name                                                                                    | Number    | Analyte Name                                     |
| Analyte is not present in reference database       |                                                   |                                                                                                 | 1         | 6-Hydroxykynurenate                              |
| Standard was not detected*                         |                                                   |                                                                                                 |           |                                                  |
| Peak not detected by GeneData**                    | 1                                                 | Homovanillic acid                                                                               | 3         | Methionine; Xanthurenic acid; N-Acetylglutamine; |
| p-value > 0.05                                     |                                                   |                                                                                                 | 3         | Glutamine; Lysine; Pyroglutamate                 |
| Effect size > 0.9                                  | 1                                                 | Allose/Fructose/<br>Galactose/Glucose/<br>Myo-inositol/Mannose/<br>Psicose/Sorbose/<br>Tagatose |           |                                                  |
| CV > 75%, or not present in 2+ groups              |                                                   |                                                                                                 | 1         | Histidine                                        |
| Incorrect trend                                    |                                                   |                                                                                                 |           |                                                  |

\* A retention time could not be obtained when the standard was tested

\*\* Confirmed by manual XIC in the raw data

Table S8. Summary of the metabolites identified in the urine samples analyzed using the ion-pairing and microflow-based methods.

|                        | Positive ESI Mode                                                                                                                                                                                                                                                                                                                                                                                                         |           | Negative ESI Mode                                                                                                                                                                                                                                                                                                                                                                                                                                         |           |
|------------------------|---------------------------------------------------------------------------------------------------------------------------------------------------------------------------------------------------------------------------------------------------------------------------------------------------------------------------------------------------------------------------------------------------------------------------|-----------|-----------------------------------------------------------------------------------------------------------------------------------------------------------------------------------------------------------------------------------------------------------------------------------------------------------------------------------------------------------------------------------------------------------------------------------------------------------|-----------|
|                        | Ion-Pairing                                                                                                                                                                                                                                                                                                                                                                                                               | Microflow | Ion-Pairing                                                                                                                                                                                                                                                                                                                                                                                                                                               | Microflow |
| Total Identified       | 91                                                                                                                                                                                                                                                                                                                                                                                                                        | 43        | 64                                                                                                                                                                                                                                                                                                                                                                                                                                                        | 41        |
| Common Analytes (#)    | 26                                                                                                                                                                                                                                                                                                                                                                                                                        |           | 26                                                                                                                                                                                                                                                                                                                                                                                                                                                        |           |
| Common Analyte (names) | 4-Aminobenzoate;<br>Adenosine/Deoxyguanosine (dG);<br>Arginine; Argininosuccinic acid;<br>Carbamoylaspartate; Cystine;<br>Deoxycytidine; Dihydroorotic acid;<br>Glutamine; Histidine; Hydroxy-proline;<br>Isoleucine; Leucine; Lysine; Methionine;<br>Norvaline;<br>O-Acetyl-homoserine; Orotic acid;<br>Phenylacetyl-glycine; Phenylalanine;<br>Pyroglutamate; Threonine; Tryptophan;<br>Tyrosine; Urocanic acid; Valine |           | 2-Aminoadipic acid/<br>N-Methylglutamate; 5- Hydroxylysine;<br>Alanine/Sarcosine; Arginine;<br>Asparagine; Cystathionine; Cystine;<br>Dihydroorotic acid; Glutamine; Glycine;<br>Glycylglycine; Guanidinosuccinic acid;<br>Homoserine/Threonine; Isoleucine;<br>N-Acetyl-glutamine;<br>N-Acetylmethionine; Ornithine;<br>p-Cresol glucuronide (pCG);<br>Phenylalanine; Pyroglutamate; Serine;<br>Tryptophan; Tyrosine; Urocanate;<br>Valeric acid; Valine |           |

Table S9. Data processing step where metabolites were filtered out of for mouse urine samples in the positive ionization mode.

| Data Processing Step Metabolite Did Not Pass | Method Metabolite Did Not Pass Data Processing In |                                                                                                                                                       |           |                                                                                                                                                                                                                                                                                                                                                 |
|----------------------------------------------|---------------------------------------------------|-------------------------------------------------------------------------------------------------------------------------------------------------------|-----------|-------------------------------------------------------------------------------------------------------------------------------------------------------------------------------------------------------------------------------------------------------------------------------------------------------------------------------------------------|
|                                              | Ion-Pairing                                       |                                                                                                                                                       | Microflow |                                                                                                                                                                                                                                                                                                                                                 |
|                                              | Number                                            | Analyte Name                                                                                                                                          | Number    | Analyte Name                                                                                                                                                                                                                                                                                                                                    |
| Analyte is not present in reference database |                                                   |                                                                                                                                                       | 13        | 1-Methyl-6,7-dihydroxy-1,2,3,4-Tetrahydroisoquinoline;<br>4-Methylene-L-glutamine;<br>5-Acetamidopentanoate;<br>7-Methylguanosine; Homostachydrine;<br>L- $\alpha$ -Aspartyl-L-hydroxyproline;<br>Oxindole; Piperidine; Prolylleucine;<br>Propanoyl phosphate;<br>DL-Thiaproline;<br>5-Methylpyrazine-2-carboxylic acid;<br>6-Hydroxykynurenate |
| Standard was not detected*                   | 1                                                 | Glutarate                                                                                                                                             | 11        | 3-Hydroxy-L-kynurenine; Benzylamine;<br>Maleimide; N-Acetylglycine;<br>Guanidinosuccinic acid;<br>O-Phospho-L-serine; Picolinic acid;<br>Quinolinic acid; 2-Hydroxyglutaric acid;<br>2-n-Tetrahydrothiophenecarboxylic acid;<br>5-Aminosalicylic acid;                                                                                          |
| Peak not detected by GeneData**              | 2                                                 | N-Formyl-L-methionine;<br>O-Succinyl-homoserine                                                                                                       | 11        | 2,4-Dihydroxypteridine;<br>2-Aminoadipic acid;<br>Cysteinesulfinic acid; Cadaverine;<br>Cortisol; Cortisone; Dihydrofolate;<br>Glucosamine; Glutathione;<br>Homocystine; Phospho(enol)pyruvic acid                                                                                                                                              |
| p-value > 0.05                               | 8                                                 | 3-Methylhistidine;<br>3-Methylhistamine;<br>Histamine;<br>N-Acetylalanine;<br>5-Aminolevulinate;<br>N-Acetylneuraminic acid;<br>Anthranilate; Betaine | 16        | 2-Aminobutyric acid/3-Aminobutyric acid;<br>3,4-Dihydroxy-1-phenylalanine;<br>3-Methoxy-L-tyrosine; Alanine;<br>Anserine; Biotin; Deoxyadenosine;<br>Glycine; Homocysteine; Hypotaurine;<br>Kynurenine; Pyridoxal; Homoarginine;<br>Methionine Sulfoxide; N-Acetyl-L-valine; Saccharopine                                                       |
| Effect size > 0.9                            | 6                                                 | 1-Methylhistidine;<br>5-HIAA;<br>5-Hydroxytryptophan;<br>Agmatine; Cysteine;<br>Sarcosine                                                             | 5         | Adipic acid; Carnitine; Glutaryl carnitine;<br>N,N,N-Trimethyl-L-lysine; Proline                                                                                                                                                                                                                                                                |
| CV > 75%, or not present in 2+ groups        | 1                                                 | Homoserine                                                                                                                                            | 7         | Asparagine; Citrulline; Cystathionine;<br>Glutamic acid; N-Methylaspartate;<br>Ornithine; Serine                                                                                                                                                                                                                                                |
| Incorrect trend                              |                                                   |                                                                                                                                                       | 2         | Homocitrulline; Xanthurenic acid                                                                                                                                                                                                                                                                                                                |

\* A retention time could not be obtained when the standard was tested

\*\* Confirmed by manual XIC in the raw data

Table S10. Data processing step where metabolites were filtered out of for mouse urine samples in the negative ionization mode.

| Data Processing Step Metabolite Did Not Pass | Method Metabolite Did Not Pass Data Processing In |                                                                                                           |           |                                                                                                                                                                                                                                                                  |
|----------------------------------------------|---------------------------------------------------|-----------------------------------------------------------------------------------------------------------|-----------|------------------------------------------------------------------------------------------------------------------------------------------------------------------------------------------------------------------------------------------------------------------|
|                                              | Ion-Pairing                                       |                                                                                                           | Microflow |                                                                                                                                                                                                                                                                  |
|                                              | Number                                            | Analyte Name                                                                                              | Number    | Analyte Name                                                                                                                                                                                                                                                     |
| Analyte is not present in reference database |                                                   |                                                                                                           | 5         | N-Methylhydantoin; Oxindole; p-Cresol sulfate (pCS); DL-Thiaproline; 6-Hydroxykynurenate                                                                                                                                                                         |
| Standard was not detected*                   | 3                                                 | Betaine; Homocysteine; Ureidopropionate                                                                   | 6         | 4-Methyl-2-oxo-pentanoic acid; Oxalic acid; 2-Hydroxyglutaric acid; Methionine Sulfoxide; N-acetyl-ornithine; Saccharopine                                                                                                                                       |
| Peak not detected by GeneData**              | 6                                                 | Adenosine; Glucosamine/ Galactosamine/ Mannosamine; Kynurenine; Methionine; N-Methylaspartate; Pyridoxine | 14        | 2-Oxoadipate; 3-Hydroxybutyrate; Citramalic acid; Fumaric acid; Maleic acid; Inosine 5'-monophosphate; Ketoglutaric acid; N-Acetyl-L-Phenylalanine; Ophthalmic acid; Quinolinic acid; S-Adenosylhomocysteine; Trigonelline; 3-Indoxylsulfate; Carbamoylaspartate |
| p-value > 0.05                               | 4                                                 | 5-HIAA; Fucose/Deoxyglucose /Rhamnose; Phosphoethanolamine; Taurine                                       | 6         | 4-Aminobutanoate/2-Aminobutyric acid/N,N-Dimethylglycine; Leucine; Malic acid; Orotic acid; Xanthurenic acid; Uridine                                                                                                                                            |
| Effect size > 0.9                            | 2                                                 | Aspartic acid; Pipecolate                                                                                 | 3         | Glutamic acid; Glycerol 3-phosphate; Phenylacetate                                                                                                                                                                                                               |
| CV > 75%, or not present in 2+ groups        |                                                   |                                                                                                           | 4         | 3,4-Dihydroxy-1-Phenylalanine; Citrulline; Histidine; Lysine                                                                                                                                                                                                     |
| Incorrect trend                              |                                                   |                                                                                                           |           |                                                                                                                                                                                                                                                                  |

\* A retention time could not be obtained when the standard was tested

\*\* Confirmed by manual XIC in the raw data
